# Supplementary material for: Cenozoic climate change and diversification on the continental shelf and slope: evolution of gastropod diversity in the family Solariellidae (Trochoidea)
Source: PubMed Central journal article supplement (PMC3631403; doi:10.1002/ece3.513), 2013-03-04

**A**

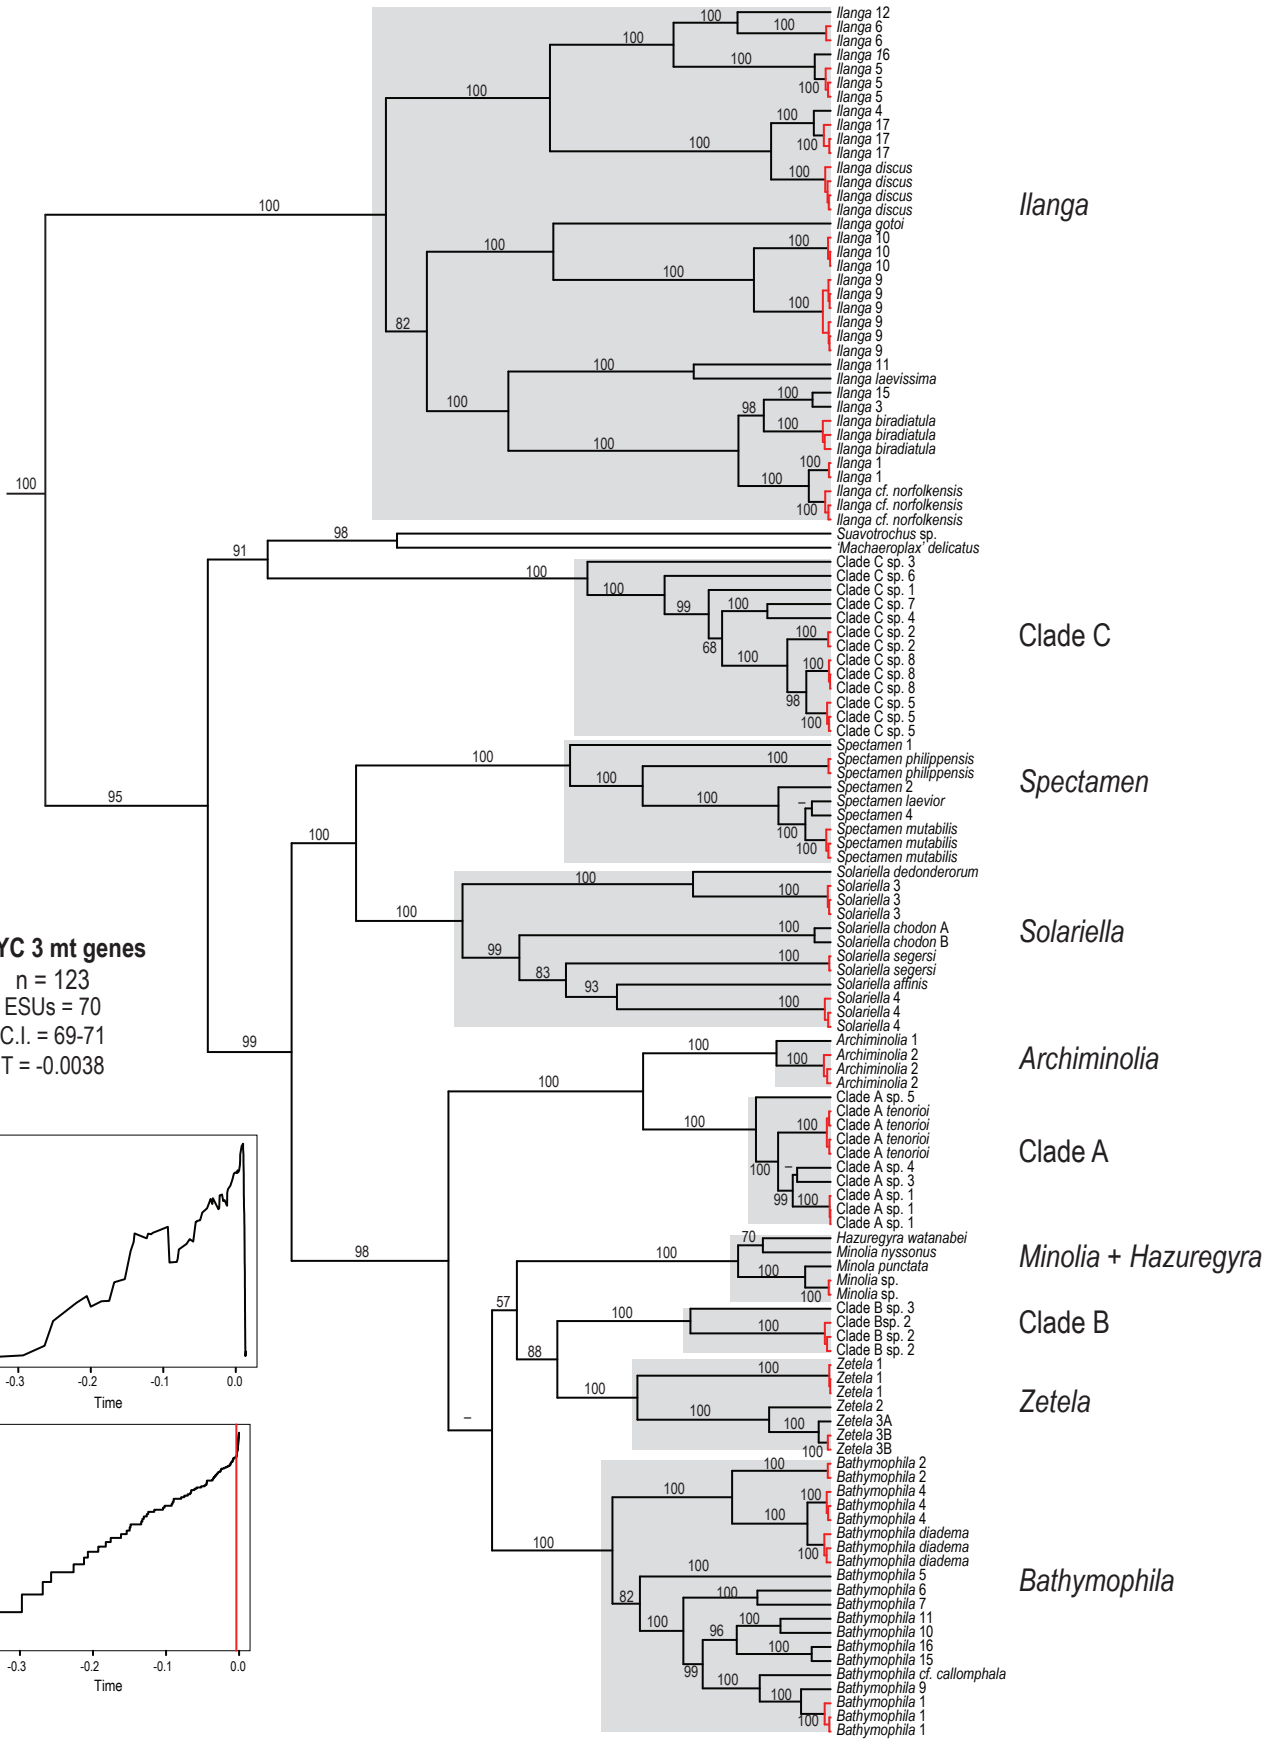

**GMYC 3 mt genes**  
 n = 123  
 ESUs = 70  
 C.I. = 69-71  
 T = -0.0038

**B**

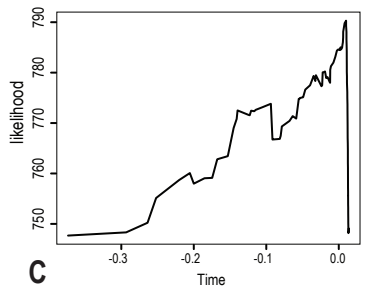

**C**

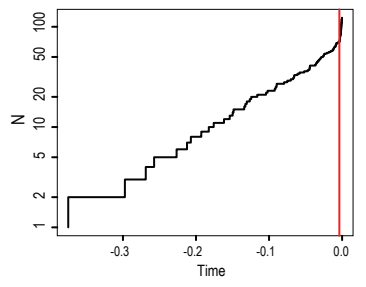

Supplement: ece30003-0887-SD2.pdf [file ece30003-0887-SD2.pdf]
