# Supplementary material for: Cenozoic climate change and diversification on the continental shelf and slope: evolution of gastropod diversity in the family Solariellidae (Trochoidea)
Source: PubMed Central journal article supplement (PMC3631403; doi:10.1002/ece3.513), 2013-03-04

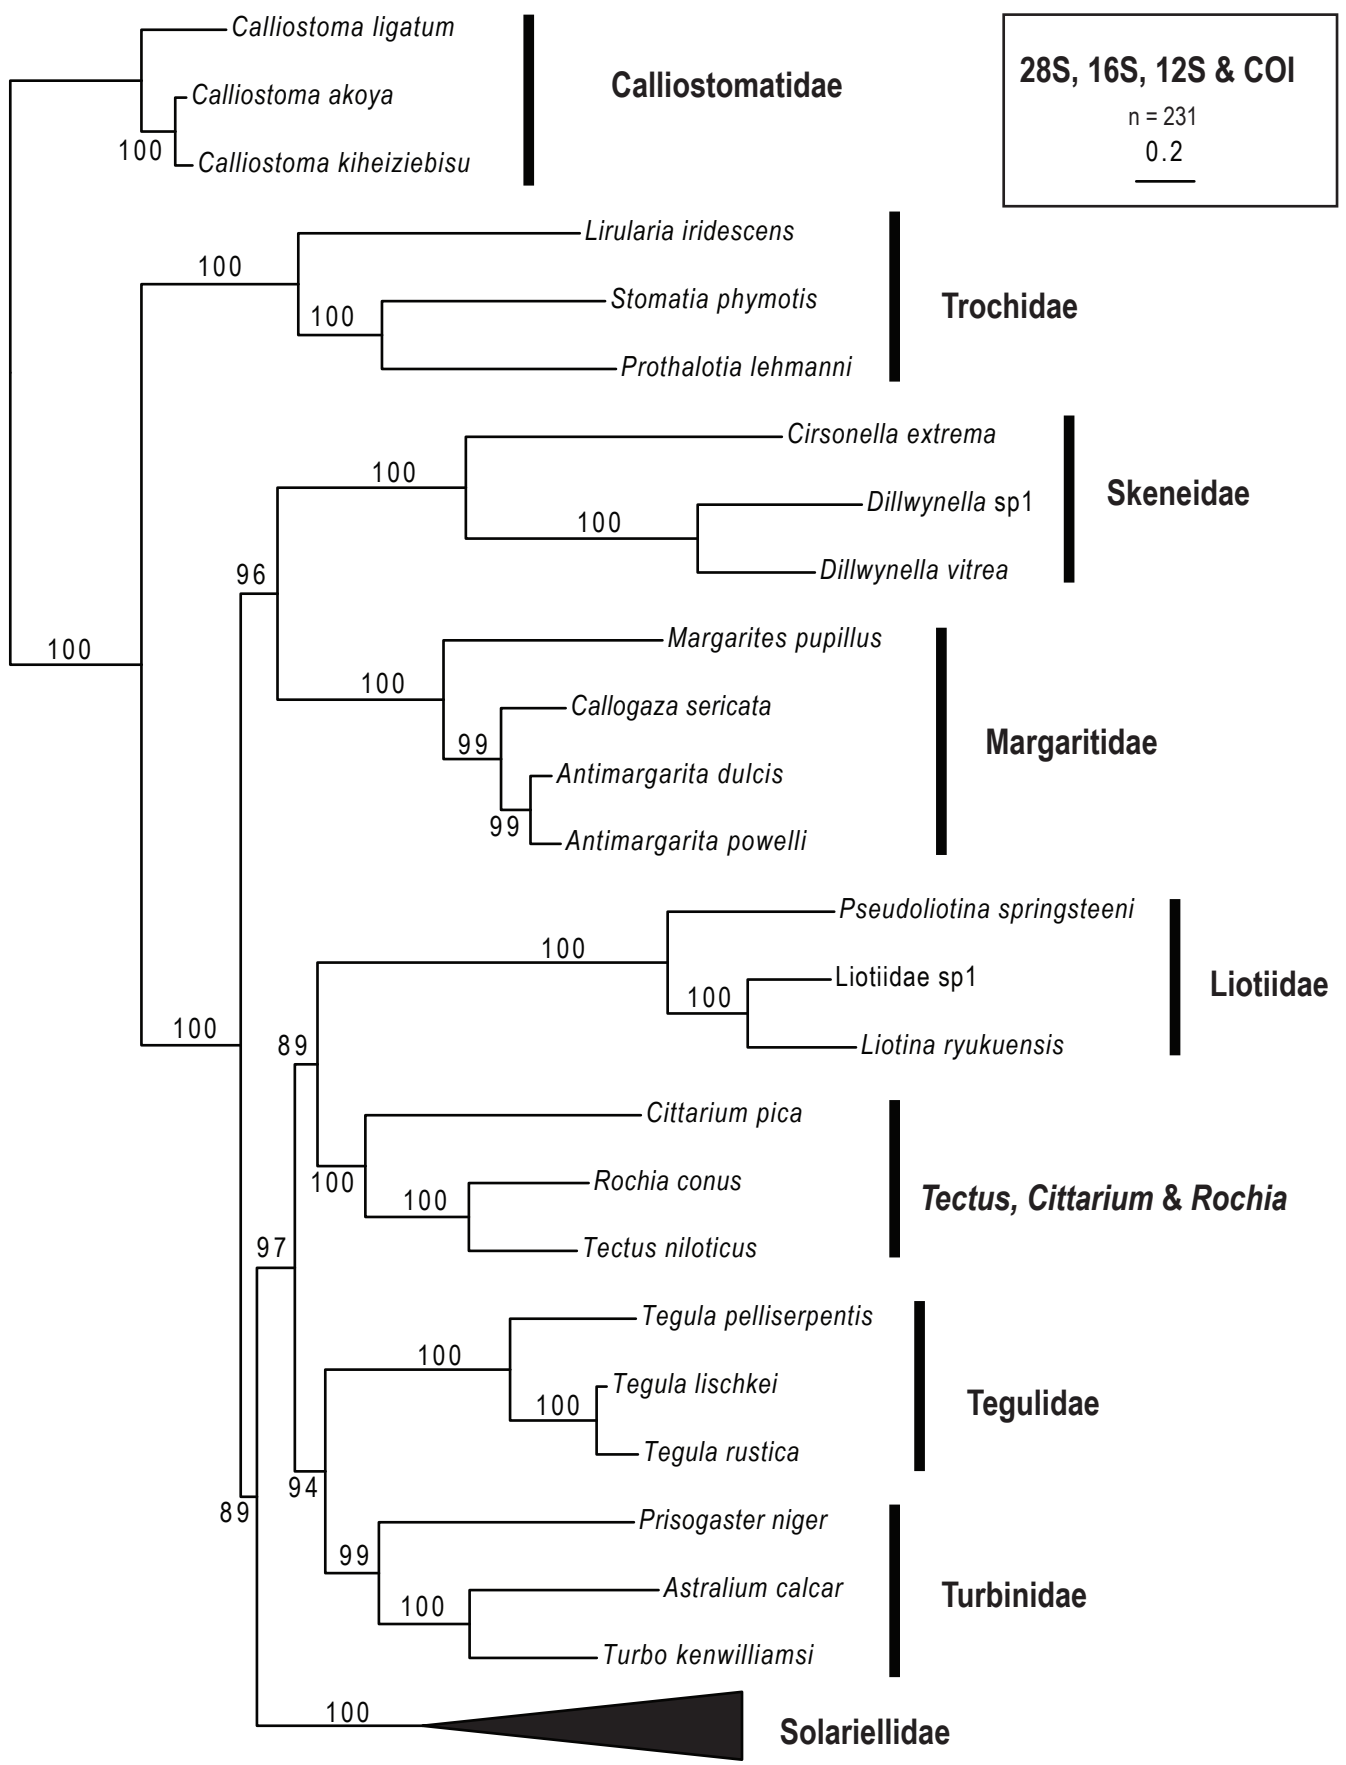

Supplement: ece30003-0887-SD3.pdf [file ece30003-0887-SD3.pdf]
